# Supplementary material for: Long- and short-term outcomes of early gastric cancer after endoscopic resection: a retrospective study from China
Source: PubMed Central journal article supplement — Endosc Int Open. 2021 Jun 21;9(7):E1086–96. doi: 10.1055/a-1381-7013 (PMC8216778; doi:10.1055/a-1381-7013), 2021-06-21
Supplement: 1839supmat_10-1055-a-1381-7013.pdf [file 1839supmat_10-1055-a-1381-7013.pdf]

## Supplementary material

Supplementary Table 1. Multivariate analysis of predictive factors for LVI.

| Characteristics  | Number of patients | OR (95% CI)       | P value |
|------------------|--------------------|-------------------|---------|
| <b>Histology</b> |                    |                   |         |
| Differentiated   | 520                | Reference         |         |
| Undifferentiated | 13                 | 0.99 (0.91 -1.07) | 0.772   |
| Mixed histology  | 37                 | 1.18 (1.12-1.25)  | <0.001  |
| <b>Size (cm)</b> | 570                | 1.02 (1.01-1.03)  | <0.001  |
| <b>Depth</b>     |                    |                   |         |
| pM or pSM1       | 537                | Reference         |         |
| pSM2             | 32                 | 1.17 (1.11-1.24)  | <0.001  |

pM: intramucosal, pSM1: depth of invasion less than 500 um from the muscularis mucosae, pSM2: depth of invasion 500 um or more from the muscularis mucosae.

## Supplementary material

Supplementary Table 2. Multivariate analysis of predictive factors for incomplete resection.

| Characteristics  | Number of patients | OR (95% CI)      | P value |
|------------------|--------------------|------------------|---------|
| <b>Histology</b> |                    |                  |         |
| Differentiated   | 520                | Reference        |         |
| Undifferentiated | 13                 | 1.27 (1.09-1.47) | 0.002   |
| Mixed histology  | 37                 | 1.15 (1.04-1.27) | 0.005   |
| <b>Size (cm)</b> | 570                | 1.03 (1.01-1.04) | 0.003   |
| <b>Depth</b>     |                    |                  |         |
| pM or pSM1       | 537                | Reference        |         |
| pSM2             | 32                 | 1.15 (1.03-1.28) | 0.01    |

pM: intramucosal, pSM1: depth of invasion less than 500 um from the muscularis mucosae, pSM2: depth of invasion 500 um or more from the muscularis mucosae.

## Supplementary material

Supplementary Table 3 Characteristics of patients with local recurrence of expanded-indication lesions who underwent additional treatment

| Age | Sex    | Macroscopic | UL | Depth | Tumor size (cm) | Histology | HM | VM | Treatment to recurrence (months) | Treatment |
|-----|--------|-------------|----|-------|-----------------|-----------|----|----|----------------------------------|-----------|
| 67  | Female | 0-IIa       | -  | pM    | 1.5             | MD        | -  | -  | 26.4                             | Surgery   |
| 75  | Female | 0-IIa+IIc   | -  | pM    | 1               | Tub1      | -  | -  | 57.2                             | ESD       |
| 78  | Male   | 0-IIa       | -  | pM    | 3.6             | Tub1      | -  | -  | 25.5                             | ESD       |
| 66  | Male   | 0-IIa       | -  | pSM1  | 2.2             | Tub1      | -  | -  | 48.3                             | Surgery   |

Tub1: well-differentiated tubular adenocarcinoma, pM: intramucosal, pSM1: depth of invasion less than 500 um from the muscularis mucosae, UL: ulceration.
